# Supplementary material for: Ubiquity of complex coacervation of DNA and proteins in aqueous solution
Source: Royal Society of Chemistry journal article supplement (doi:10.1039/d0sm00543f), 2020-01-01
Supplement: d0sm00543f1.pdf [file d0sm00543f1.pdf]

## Supplementary Information

### Ubiquity of Complex Coacervation of DNA and Protein in Aqueous Solution

Priyanka Kaushik<sup>a</sup>, P.K. Pandey<sup>a,b</sup>, V.K. Aswal<sup>c</sup> and H.B. Bohidar<sup>a\*</sup>

<sup>a</sup>School of Physical Sciences, Jawaharlal Nehru University, New Delhi, India

<sup>b</sup>Experimental Physics, Saarland University, 66123 Saarbrücken, Germany

<sup>c</sup>Solid State Physics Division, Bhabha Atomic Research Centre, Mumbai, India

\*Corresponding author email: [bohi0700@mail.jnu.ac.in](mailto:bohi0700@mail.jnu.ac.in)

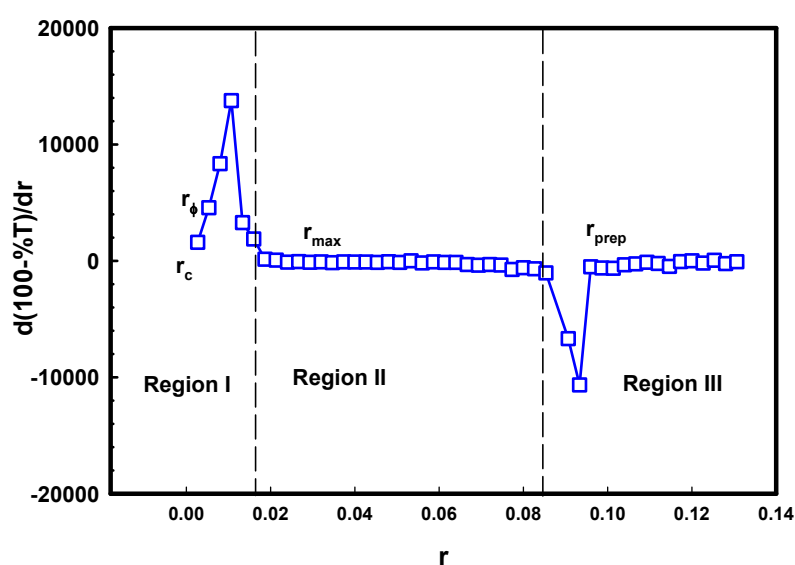

**Fig. S1.** Variation of turbidity derivative  $d(100-\%T)/dr$  with mixing ratio  $r = [\text{DNA}]: [\text{E}]$ . Spikes in the derivative plot clearly show the transition points  $r_\phi$  and  $r_{precip}$  where formation of soluble and insoluble complexes ensue (see text for details). The region bound by  $r_\phi$ ,  $r_{max}$  and  $r_{precip}$  defines the coacervation region.

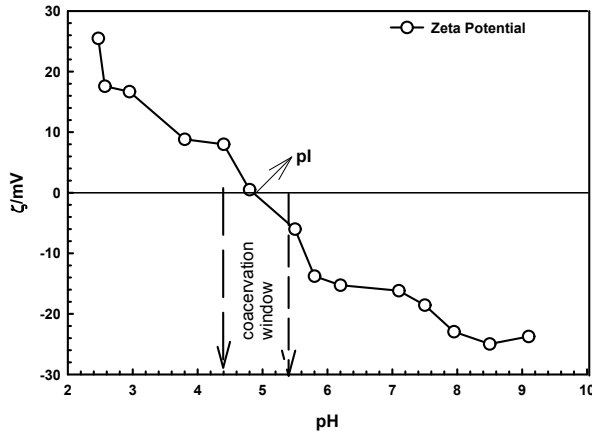

**Fig. S2:** Variation of zeta potential of elastin (concentration= 0.05 % (w/v)) with solution pH measured at room temperature. In the coacervation window ( $pH=pI\pm 3$ ) the zeta potential remained in the region 8 to -6 mV.

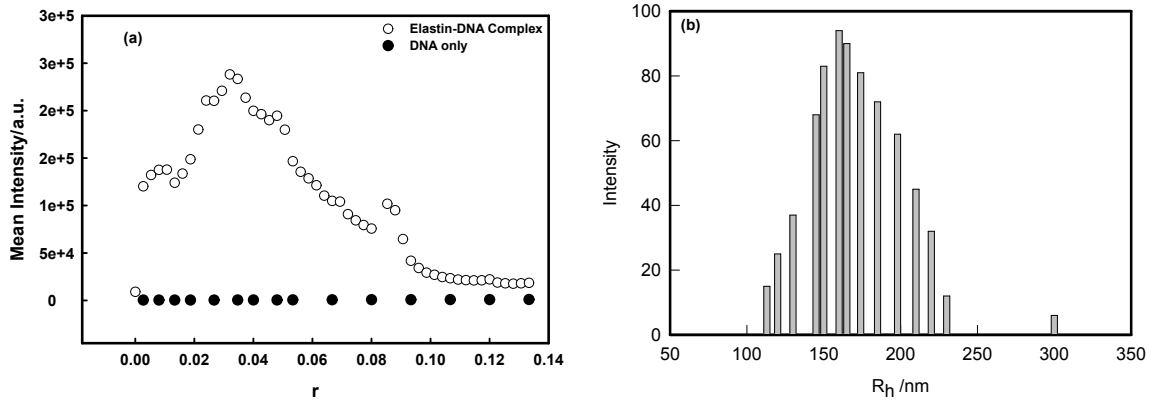

**Fig. S3.** (a) Variation of scattering intensity for elastin-DNA complex, and DNA alone with mixing ratio  $r$ . (b) Size histogram for DNA at concentration  $1.33 \times 10^{-4}$  % (w/v). Mean size =  $160 \pm 16$  nm.

### S1. SANS Analysis

The scattered intensity from DNA can be represented as

$$I(q)_{DNA} = (\rho_{DNA} - \rho_D)^2 C_{DNA} M_{DNA} P(q)_{DNA}$$

Where the concentration, molecular weight and form factors are represented as  $C$ ,  $M$  and  $P(q)$ . Neutron scattering length density of DNA is  $\rho_{DNA}$  and same for  $D_2O$  is  $\rho_D$ .

And the same from elastin will be

$$I(q)_E = (\rho_E - \rho_D)^2 C_E M_E P(q)_E$$

Hence

$$\frac{I(q)_{DNA}}{I(q)_E} = \frac{(\rho_{DNA} - \rho_D)^2 C_{DNA} M_{DNA} P(q)_{DNA}}{(\rho_E - \rho_D)^2 C_E M_E P(q)_E}$$

In the Guinier limit, the form factor is given by

$$P(q) \approx \exp - \left( q^2 R_g^2 / 3 \right)$$

For both DNA and elastin,  $q^2 R_g^2 \ll 1$  which implies  $P(q) \approx 1$ .

$C_{DNA}/C_E = r$ ,  $M_E \approx 5 \times 10^4$  Da, and  $M_{DNA} = 1.6 \times 10^6$  Da. The robust coacervation window pertained to the mixing ratio range of  $r = 0.0267 - 0.0933$ .

$$\frac{I(q)_{DNA}}{I(q)_E}$$

Thus, the ratio  $\frac{I(q)_{DNA}}{I(q)_E}$  varied between 2 to 8 indicating the dominance of scattering from DNA. Please note that during the formation of soluble complexes, DNA was fully consumed while part of elastin was available as free protein. But this fraction mostly remained in the supernatant and did not make contribution to SANS intensity.
